# Supplementary material
Source: publisher figshare collection journal article supplement (https://sage.figshare.com/ndownloader/files/17855363)
Supplement: Supplementary file 1 [file 17855363]

**Supplementary File 1**

**Checklist for Nurse-Patient Interactions:**  
**“Health-Related Quality of Life Assessment in Clinical Nephrology Nursing Practice”**

This form will be used to record the number of issues related to the KDQOL-36 and ESAS-r: Renal discussed during the patient-nurse interaction. We are also interested in knowing who initiated the conversation (or mentioned the issue first). Please tick the appropriate box and write number one (1) by the tick for the person who mentioned the issue first.

Patient Participant #: \_\_\_\_\_ Nurse Participant #: \_\_\_\_\_ Date: \_\_\_\_\_ Location: \_\_\_\_\_  
 1<sup>st</sup> or 2<sup>nd</sup> time patient participated in study: \_\_\_\_\_ Name of RA: \_\_\_\_\_

| <u>ESAS</u>                                  | Nurse | Patient | <u>KDQOL (con't)</u>                      | Nurse | Patient |
|----------------------------------------------|-------|---------|-------------------------------------------|-------|---------|
|                                              |       |         |                                           |       |         |
| Pain                                         |       |         | <b>Burden of Kidney Dx</b>                |       |         |
| Tiredness                                    |       |         | Dx interferes with life                   |       |         |
| Drowsiness                                   |       |         | Time spent dealing with dx                |       |         |
| Appetite                                     |       |         | Frustration in dealing with dx            |       |         |
| Feeling of wellbeing                         |       |         | Burden to family                          |       |         |
| Problems with sleeping                       |       |         |                                           |       |         |
|                                              |       |         | <b>Symptoms</b>                           |       |         |
| <b><u>ESAS &amp; KDQOL</u></b>               |       |         | Muscle soreness                           |       |         |
| Nausea / upset stomach                       |       |         | Chest pain                                |       |         |
| Depression / downhearted or blue             |       |         | Cramps                                    |       |         |
| Anxiety vs feeling calm / peaceful           |       |         | Dry skin                                  |       |         |
| Itching                                      |       |         | Faintness / dizziness                     |       |         |
| Shortness of breath                          |       |         | Washed out / drained                      |       |         |
|                                              |       |         | Numbness in hands / feet                  |       |         |
|                                              |       |         | Problems with access site / PD catheter   |       |         |
| <b>Physical and Mental Component Summary</b> |       |         |                                           |       |         |
| Overall health                               |       |         | <b>Effects of Kidney Dx on Daily Life</b> |       |         |
| Moderate activities                          |       |         | Fluid restriction                         |       |         |
| Climbing stairs                              |       |         | Dietary restriction                       |       |         |
| Accomplishing less (due to physical)         |       |         | Ability to work around house              |       |         |
| Limited in work/activities                   |       |         | Travel                                    |       |         |
| Accomplished less (due to emotions)          |       |         | Dependence on healthcare professionals    |       |         |
| Didn't work as carefully                     |       |         | Stress / worries caused by dx             |       |         |
| Pain interfering with work                   |       |         | Sex life                                  |       |         |
| Energy                                       |       |         | Personal Appearance                       |       |         |
| Interference with social activities          |       |         |                                           |       |         |
|                                              |       |         | <b>Other</b>                              |       |         |
|                                              |       |         |                                           |       |         |

|          |                                                                   |                                                             |                                                              |                                                               |                                           |
|----------|-------------------------------------------------------------------|-------------------------------------------------------------|--------------------------------------------------------------|---------------------------------------------------------------|-------------------------------------------|
| 1. ESAS  | <input type="checkbox"/> Completed on iPad                        | <input type="checkbox"/> Completed on paper                 |                                                              |                                                               |                                           |
| 2. KDQOL | <input type="checkbox"/> Chart Report (iPad) prior to nurse visit | <input type="checkbox"/> Paper version prior to nurse visit | <input type="checkbox"/> Completed on iPad after nurse visit | <input type="checkbox"/> Completed on paper after nurse visit | <input type="checkbox"/> Did not complete |

|                              |                                  |                               |                                          |                                                        |        |
|------------------------------|----------------------------------|-------------------------------|------------------------------------------|--------------------------------------------------------|--------|
| 3. Level of looking at ESAS  | <input type="checkbox"/> Not all | <input type="checkbox"/> Min. | <input type="checkbox"/> Scanned through | <input type="checkbox"/> Referenced throughout meeting | Notes: |
| 4. Level of looking at KDQOL | <input type="checkbox"/> Not all | <input type="checkbox"/> Min. | <input type="checkbox"/> Scanned through | <input type="checkbox"/> Referenced throughout meeting | Notes: |
